# Supplementary material
Source: PubMed Central journal article supplement (PMC3597752)

# Supplemental Figure 1

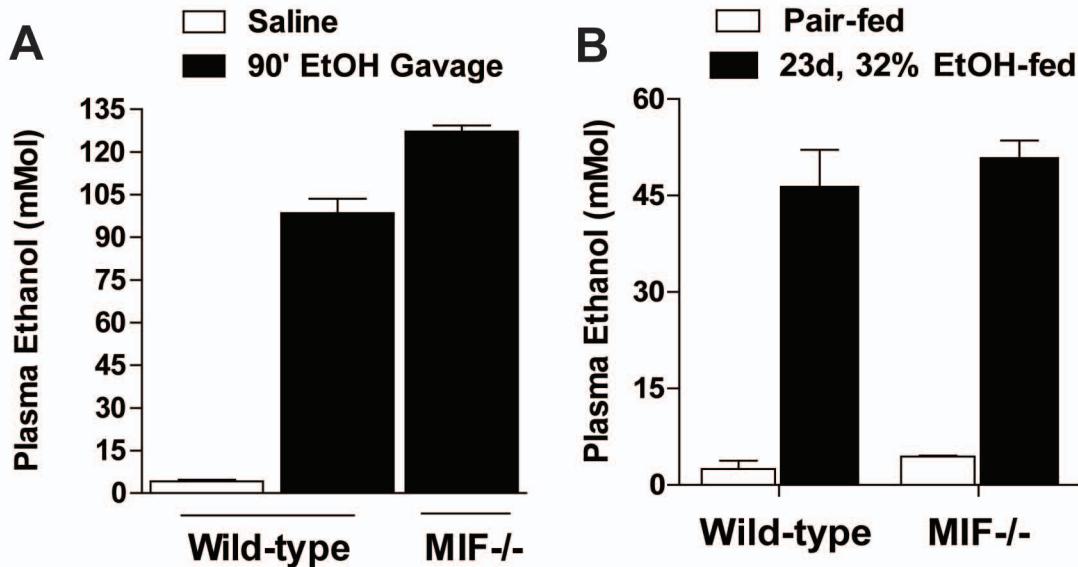

# Supplemental Figure 2

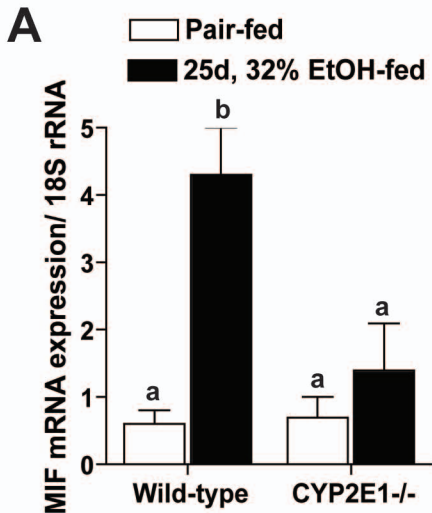

# Supplemental Figure 3

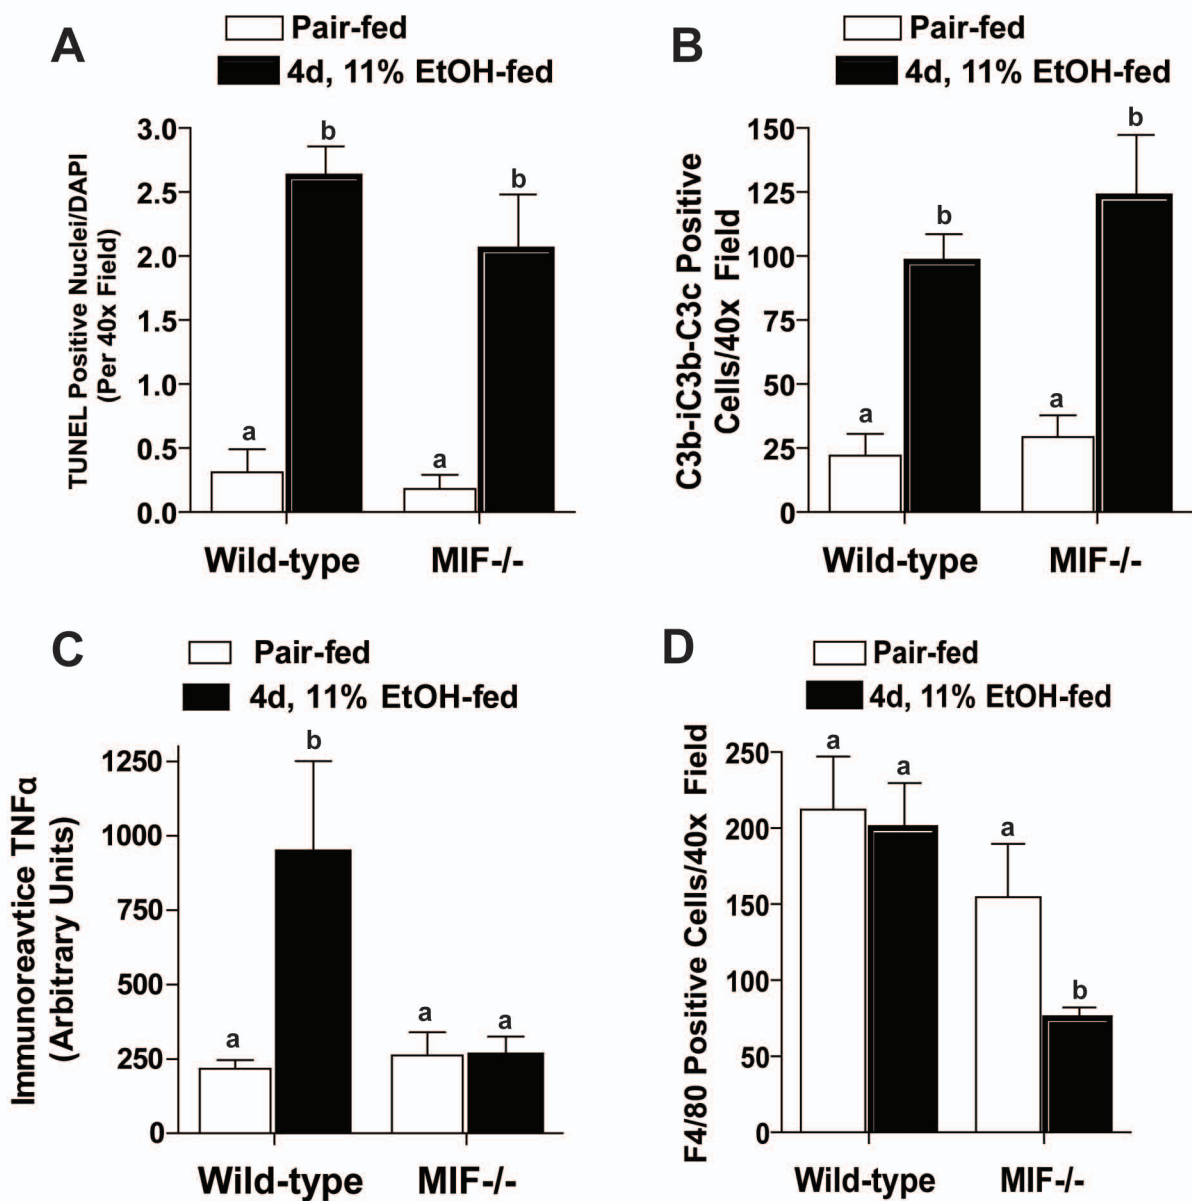

**E** F4/80 (Green) - TUNEL (Red)  
4d, 11% EtOH

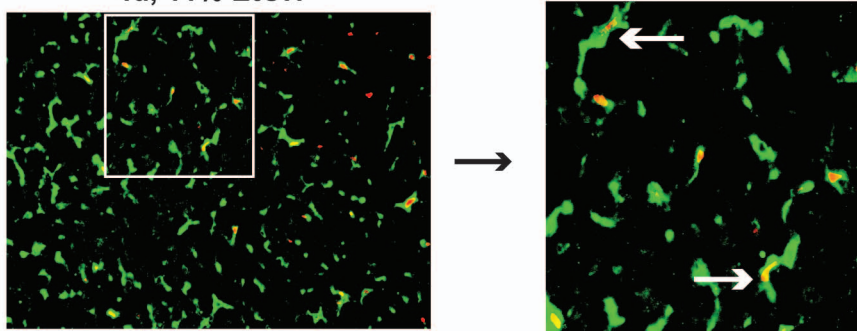

# Supplemental Figure 4

**A**

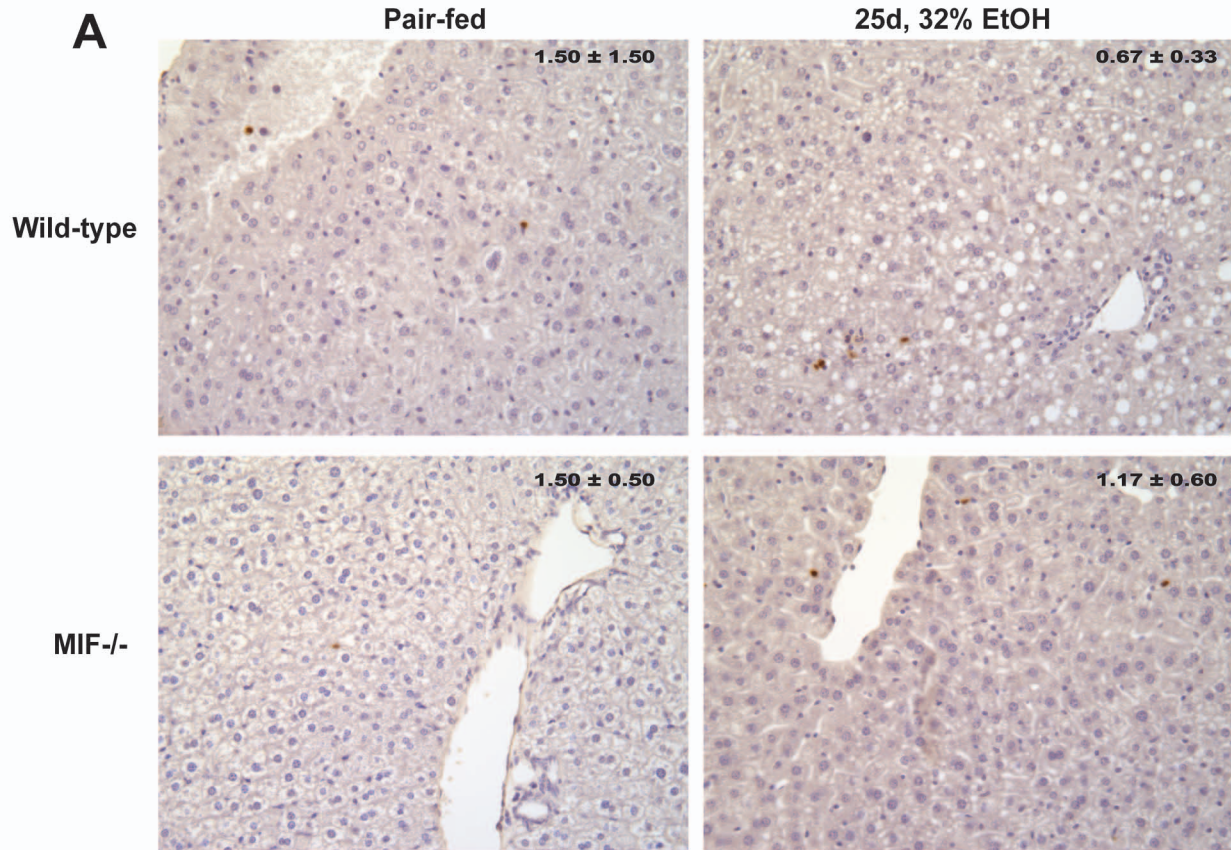

**B**

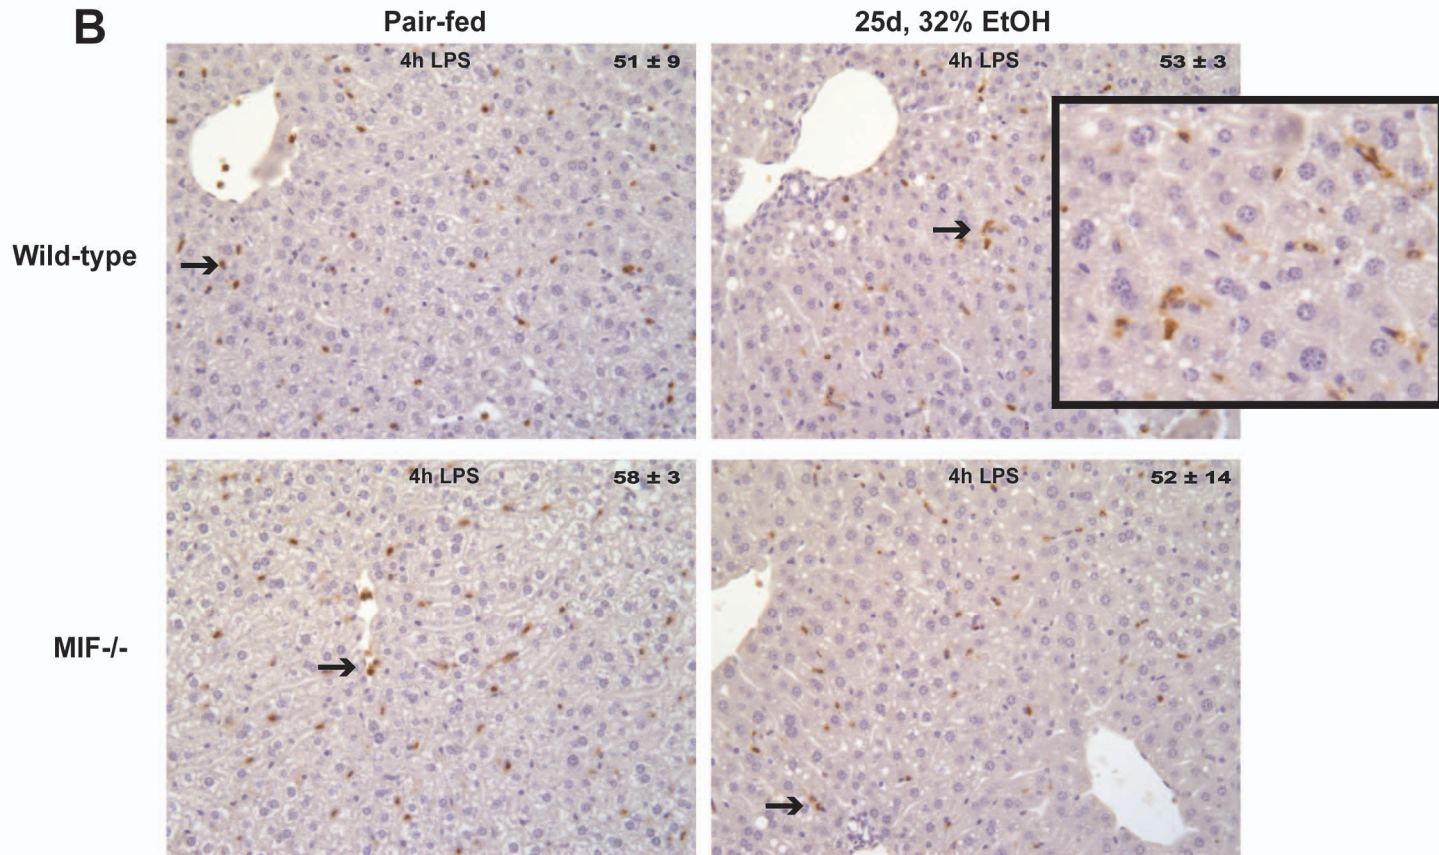

Supplement: NIHMS422680-supplement-Supp_Figure_S1-S4.pdf [file NIHMS422680-supplement-Supp_Figure_S1-S4.pdf]
